# Supplementary material
Source: PubMed Central journal article supplement (PMC3121367)
Supplement: supp_M111.228924_jbc.M111.228924-1.pdf [file supp_M111.228924_jbc.M111.228924-1.pdf]

Fig. S1

5' GAGGCCAGAGTGCCATCGAAGGTAATTATAGAGACAGTAAAATCCTTTTACTCT  
GGGAAAAATAAAATGCTGGGTGTCTCACAAAATTTCAGAACCTGATTTCAAACGGA  
TCATAACAAAGAGGAGATCAAATTTAGCATGGTGGACTGCTCGACAGGATATATTT  
GTCAATGGAATGTTTCCACATATTATAACCACCAACATGAGAAAAAATGATCATTG  
TTTATTTGAAGCTTGATGATATTCTAACGCTGCCTTTTCTTCTCATTTTAGAGA  
AAA **ATGAGCAGCGGAATTGTTGGATT** GTAAG **ATG** TGCAGAGATGAATCTAAGAG  
GCCCCCTTCAAACCTTACTTTGGAGGAAGTATTACAGTGGGCCAGTCTTTTGAAA  
ATTTAATGGCTACAAAAT 3'

**Primer sequences:**

**GSP1:** 5' TCCAAAGTAAGGTTTGAAGG 3' (1<sup>st</sup> strand cDNA synthesis)

**GSP2:** 5' AAATCCAACAATTCGCCTGC 3' (nested PCR primer)

**Supplementary Fig. 1** RNA from LAD2 mast cells was reverse transcribed into cDNA using GSP1 (underlined), which is located immediately downstream of the translation initiation codon in exon 4 (yellow). The nested primer GSP2 (green box) together with a linker primer ligated to cDNA were used to amplify the upstream *RGS13* cDNA sequence.

# Supplementary Table 1

## Oligonucleotides for p53-DNA Pulldown assay

### p53 distal (-1417)

SENSE : 5' TCCTGTTACCTGCCCTAACCTGACAGCTCT 3'

ANTIENSENSE : 5' AGAGCTGTCAGGTTAGGGCAGGTAACAGGA 3'

### p53 distal (-1417) mutant

SENSE : 5' TTCAGATTTTGAAGGggTGTTAACAAACTG 3'

ANTIENSENSE : 5' CAGTTTGTTAACAccCCTTCAAATCTGAA-3'

### p53 proximal (-442)

SENSE : 5' TTCAGATTTTGAAGGCATGTTAACAAACTG 3'

ANTIENSENSE : 5' CAGTTTGTTAACATGCCCTCAAATCTGAA 3'

### Consensus p53

SENSE : 5' TTCAGATTTTGAAGGCATGCCACAAACTG 3'

ANTIENSENSE : 5' CAGTTTGTGGGCATGCCCTCAAATCTGAA 3'

### Consensus p53

SENSE : 5' TTCAGATTTTGAAGggTGCCACAAACTG 3'

ANTIENSENSE : 5' CAGTTTGTGGGCAccCCTCAAATCTGAA 3'

### Negative control

SENSE : 5' CAGACAATTCACCCAGTGTCCAAGAGTTT 3'

ANTIENSENSE : 5' AACTCTTGGACACTGGGGTGAATTGTCTG 3'

Fig. S2

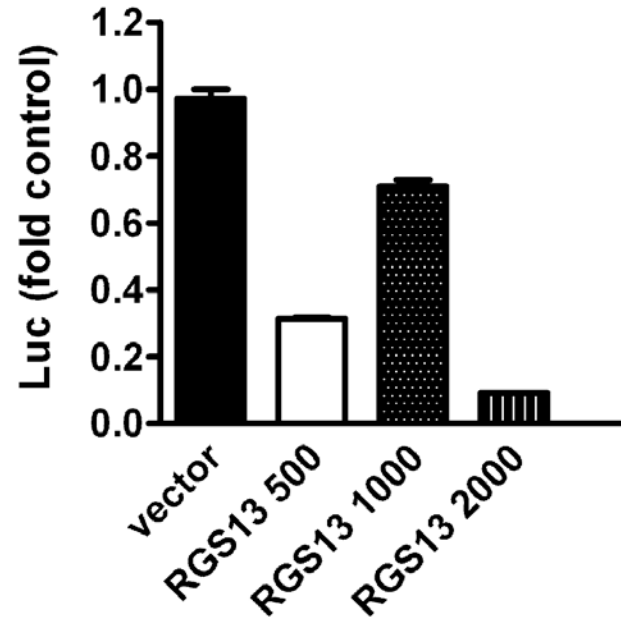

**Supplementary Fig. 2.** pGL3 constructs were transfected into HeLa cells together with a plasmid encoding *Renilla* luciferase using Lipofectamine. 24 h, luciferase activity was measured in cell lysates as described in the Methods. Data (mean +/- S.D.) are from a single experiment measured in duplicate and representative of 3 similar experiments.
